# Supplementary material
Source: ML conference proceedings conference paper supplement (https://www.ecva.net/papers/eccv_2020/papers_ECCV/html/123510613_ECCV_2020_paper.php)
Supplement: Supplementary file 2 [file 123510613-supp.zip]

Archive with 3 entries (2 files):
- 0013-supp/
- 0013-supp/0013-supp.pdf
- 0013-supp/supp.mp4
